# Supplementary material
Source: PubMed Central journal article supplement (PMC8352370)
Supplement: NIHMS1729620-supplement-Supplemental_Material.pdf [file NIHMS1729620-supplement-Supplemental_Material.pdf]

Supplemental Table

*Sensitivity and specificity across a range of total Seasonal Beliefs Questionnaire score cutpoints for distinguishing seasonal affective disorder (n = 114) from nonseasonal Major Depressive Disorder (n = 35) case status*

| SBQ total score | True positives (n) | False negatives (n) | True negatives (n) | False positives (n) | Sensitivity | Specificity | Youden index |
|-----------------|--------------------|---------------------|--------------------|---------------------|-------------|-------------|--------------|
| 167             | 17                 | 97                  | 35                 | 0                   | 0.149       | 1           | 0.149        |
| 159             | 31                 | 83                  | 33                 | 2                   | 0.272       | 0.943       | 0.215        |
| 154             | 41                 | 73                  | 32                 | 3                   | 0.360       | 0.914       | 0.274        |
| 148             | 57                 | 57                  | 30                 | 5                   | 0.500       | 0.857       | 0.357        |
| 146             | 61                 | 53                  | 29                 | 6                   | 0.535       | 0.829       | 0.364        |
| 142             | 75                 | 39                  | 28                 | 7                   | 0.658       | 0.800       | 0.458        |
| 138             | 79                 | 35                  | 27                 | 8                   | 0.693       | 0.771       | 0.464        |
| 136             | 83                 | 31                  | 26                 | 9                   | 0.728       | 0.743       | 0.471        |
| 132             | 91                 | 23                  | 25                 | 10                  | 0.798       | 0.714       | 0.513        |
| 131             | 92                 | 22                  | 22                 | 13                  | 0.807       | 0.629       | 0.436        |
| 129             | 97                 | 17                  | 20                 | 15                  | 0.851       | 0.571       | 0.422        |
| 126             | 101                | 13                  | 18                 | 17                  | 0.886       | 0.514       | 0.400        |
| 125             | 102                | 12                  | 17                 | 18                  | 0.895       | 0.486       | 0.380        |
| 121             | 107                | 7                   | 16                 | 19                  | 0.939       | 0.457       | 0.396        |
| 109             | 110                | 4                   | 14                 | 21                  | 0.965       | 0.400       | 0.365        |
| 106             | 111                | 3                   | 10                 | 25                  | 0.974       | 0.286       | 0.259        |
| 104             | 112                | 2                   | 9                  | 26                  | 0.982       | 0.257       | 0.240        |
| 99              | 113                | 1                   | 7                  | 28                  | 0.991       | 0.200       | 0.191        |
| 98              | 114                | 0                   | 6                  | 29                  | 1           | 0.171       | 0.171        |

*Note.* SBQ = Seasonal Beliefs Questionnaire.
